# Supplementary material for: Association Between Anthropometric Measurements and the Amount of Fat Aspirated in Waist and Abdominal Liposuction: A 20-year Retrospective Study
Source: Research Square preprint supplement (doi:10.21203/rs.3.rs-310612/v1), 2021-03-18
Supplement: Supplementary file 1 [file a165b529b5fa72812249c62e.docx]

| Table S1 The comparision between the full dataset and dataset with outliers removed | | | | |
| --- | --- | --- | --- | --- |
|  | Full dataset | | The dataset with outliers removed | P Value |
|  | N=742 | | N=727 |  |
| Age, median (SQR), years | 37(8) | | 37(7) | 0.9133 |
| Height, median (SQR), cm | 162(5) | | 162(5） | 0.8579 |
| Weight, median (SQR), kg | 62(13) | | 62(13) | 0.5391 |
| WC, median (SQR), cm | 95(10) | | 94(10) | 0.5237 |
| BMI, median (SQR), kg/m2 | 23.56(5.00) | | 23.52(4.70) | 0.5418 |
| WHtR, median (SQR) | 0.59(0.08) | | 0.58(0.06) | 0.5277 |
| Fat Volume, median (SQR), ml | 2350(1300) | | 2300(1200) | 0.5102 |
| WC, waist circumference BMI, body mass index WHtR, waist-to-height ratio IQR, Inter-Quartile Range | | | | |
| Table S2 The Spearman correlation coefficient between the anthropometric measurements and fat volume in patients with outliers removed | | | | |
|  | | Spearman correlation coefficient | | | | P Value |
| Age (years) | | 0.166 | | | | 0.000 |
| Height (cm) | | 0.031 | | | | 0.398 |
| Weight (kg) | | 0.586 | | | | 0.000 |
| WC (cm) | | 0.688 | | | | 0.000 |
| BMI (kg/m2) | | 0.626 | | | | 0.000 |
| WHtR | | 0.681 | | | | 0.000 |
| WC, waist circumference BMI, body mass index WHtR, waist-to-height ratio | | | | | | |
